# *Pax7* is regulated by *cMyb* during early neural crest development through a novel enhancer

Stephanie Vadasz, Jonathan Marquez, Maria Tulloch, Natalia A. Shylo and Martín I. García-Castro\*

## SUMMARY

The neural crest (NC) is a migratory population of cells unique to vertebrates that generates many diverse derivatives. NC cells arise during gastrulation at the neural plate border (NPB), which is later elevated as the neural folds (NFs) form and fuse in the dorsal region of the closed neural tube, from where NC cells emigrate. In chick embryos, *Pax7* is an early marker, and necessary component of NC development. Unlike other early NPB markers, which are co-expressed in lateral ectoderm, medial neural plate or posterior-lateral mesoderm, *Pax7* early expression seems more restricted to the NPB. However, the molecular mechanisms controlling early *Pax7* expression remain poorly understood. Here, we identify a novel enhancer of *Pax7* in avian embryos that replicates the expression of *Pax7* associated with early NC development. Expression from this enhancer is found in early NPB, NFs and early emigrating NC, but unlike *Pax7*, which is also expressed in mesodermal derivatives, this enhancer is not active in somites. Further analysis demonstrates that *cMyb* is able to interact with this enhancer and modulates reporter and endogenous early *Pax7* expression; thus, *cMyb* is identified as a novel regulator of *Pax7* in early NC development.

**KEY WORDS:** Neural plate border, Neural crest, PAX7, cMyb, Enhancer, Chick

## INTRODUCTION

Neural crest cells (NCCs) are multipotent migratory cells unique to vertebrates, that appear at the border of the neural plate (NP) and non-neural ectoderm (NNE), incorporate into the neural folds (NFs)/dorsal neural tube and migrate in stereotypic patterns throughout the embryo. NCCs differentiate at their final locations, generating different cell types, including cranial bone and cartilage, adipose tissue, neurons and glia of the peripheral nervous system, and pigment cells (Le Douarin and Kalcheim, 1999). Defects in NCCs lead to neurocristopathies, which include melanomas, neuroblastomas, cleft lip/palate and Hirschsprung's disease (Bolande, 1997; Farlie et al., 2004; Etchevers et al., 2006).

NC development is marked by the participation of signaling molecules and transcription factors (TFs) (Stuhlmiller and García-Castro, 2012b; Milet and Monsoro-Burq, 2012). Analyses of expression profiles, gain and loss of function, and *cis*-regulatory elements have been integrated into models of regulatory interactions known as neural crest gene regulatory network (NC-GRN) (Mayor et al., 1999; Meulemans and Bronner-Fraser, 2004; Steventon et al., 2005; Sauka-Spengler and Bronner-Fraser, 2008; Betancur et al., 2010b). The NC-GRN proposes that signaling molecules, including Wnts, bone morphogenetic proteins (BMPs) and fibroblast growth factors (FGFs), establish the NPB by inducing the expression of a group of TFs known as border specifiers (*Msx1/2*, *Pax3/7*, *Dlx3/5*). Signaling molecules and border specifiers direct the expression of the next TFs known as neural crest specifiers (*Snail1/2*, *Sox8/9/10*, *FoxD3*, *AP-2*, *Twist*), which further induce expression of genes responsible for migration and differentiation.

The expression of the cohort of NC-TFs and markers is regulated in turn by their DNA-regulatory elements and the TFs with which

they interact. Analysis of these components is recent and scarce. In *Xenopus*, the homeobox gene *Gbx2*, an early NCC marker, is directly activated by Wnt signaling (Li et al., 2009), and AP-2 is directly activated by *Pax3* (de Crozé et al., 2011). In zebrafish, *Pax3* and *Zic1* enhancers responsive to BMP, FGF and Wnt signaling have been identified (Garnett et al., 2012), and AP2 has been shown to regulate *Sox10* (Van Otterloo et al., 2012), whereas in chick embryos, cranial NC expression of *Sox10* depends on the synergistic activities of *Ets1*, *Sox9* and *cMyb* (Betancur et al., 2010a). Overall, in amniotes, little is known about the regulatory elements and TFs responsible for the initial formation of NCCs.

*Pax7* is a transcription factor with an eminent role in muscle development and homeostasis (Buckingham and Relaix, 2007; Wang and Rudnicki, 2012), and important functions for NC development in avians, rodents and humans (Basch et al., 2006; Butali et al., 2013; Mansouri et al., 1996). In chick embryos, *Pax7* is required for early NC development (Basch et al., 2006), and has been recently shown to undergo post-translational modification by the SUMOylation enzyme Ubc9. The SUMOylation of *Pax7* enables *Pax7* functions in NC development, C2C12 myogenic differentiation and transcriptional activation (Luan et al., 2013). Importantly, *Pax7* is one of the earliest markers of the NPB, and unlike other early NPB markers, which are co-expressed in lateral ectoderm (*AP-2*, *Hairy2*, *Msx1/2*, *Dlx5*), medial NP (*Zic1/2*, *Gbx2*, *Meis3*) or the primitive streak/prospective mesoderm (*Msx1*, *Pax3*, *cMyc*), *Pax7* early expression becomes quickly restricted to the NPB (Basch et al., 2006; Otto et al., 2006; Khudyakov and Bronner-Fraser, 2009). This restricted expression offers a unique opportunity to advance our understanding of early events of NC formation. The expression of *Pax7* has been analyzed in different contexts in various organisms, and it is known to be responsive to BMP, Wnt and FGF signals (Liem et al., 1997; Liem et al., 2000; Litingtung and Chiang, 2000; Briscoe et al., 2001; Basch et al., 2006; Otto et al., 2006; Maczkowiak et al., 2010; Stuhlmiller and García-Castro, 2012a). Analysis of mouse genomic sequences upstream of *Pax7* identified a 10 kb region able to recapitulate endogenous *Pax7* expression in only a few migratory cranial NC cells and the roof plate (Lang et al., 2003). However, the

Department of Molecular, Cellular, and Developmental Biology, Yale University, New Haven, CT 06520-8103, USA.

\* Author for correspondence (martin.garcia-castro@yale.edu)

regulatory elements and TFs that initiate the expression of *Pax7* at the NPB have not been reported.

Here, we identify a novel *Pax7* cis-regulatory element that directs expression in the avian NPB, NFs and early migrating NC cells, similar to the endogenous *Pax7* expression associated with early NC. This element does not provide expression in later NC or in mesoderm, where endogenous *Pax7* is seen. Through mutagenesis and overexpression studies, we unveil *cMyb* as a regulator of this enhancer and of endogenous early *Pax7* expression. Our study is the first to demonstrate the ability of *cMyb* to regulate a border specifier directly during NC development and thus proposes a fundamental role for *cMyb* during the early phases of the NC-GRN.

## MATERIALS AND METHODS

### Sequence conservation and TF-binding analysis

Sequence conservation was determined using VISTA Browser (Visel et al., 2007), over a 50 bp window with 70% conserved identity. Putative TF-binding sites were identified using the JASPAR core vertebrate database (Bryne et al., 2008).

### Plasmid constructs

Enhancer constructs were PCR amplified (DNeasy Kit, Qiagen) from genomic chick or human DNA (a gift from J. Noonan, New Haven, CT, USA), and cloned into ptkEGFP (a gift from H. Kondoh, Osaka, Japan) or ptkmCherry (a gift from D. Meulemans, Boulder, CO, USA) using *KpnI* and *XhoI*. pRFP was generated by removing the miRNA cassette from pRFP RNAi (ARK Genomics). Deletion constructs were generated by first amplifying each end with primers containing 15 bp of internal overlapping sequence followed by fusion by another round of PCR with each end fragment as a template and the original P7U8 primers. pCIR and cMyb pCIR overexpression constructs were donated by T. Sauka-Spengler (Oxford, UK). cMyb was blunt cloned into pCIG-*SmaI*. Dominant-negative cMyb (*DNcMyb*) was generated by PCR amplification of the DNA-binding domain, adding *SmaI* and *XbaI* sites to clone into pCIG. pcDNA, ETS1-pcDNA and Klf4, were gifts from C. Vercamer (Lille, France) and W. Lu (USC, Los Angeles, USA). Zeb1 and Klf4 pcDNA constructs were generated by Gateway cloning into pDEST40 (Invitrogen). Human full-length cDNA clones were used as PCR templates, provided by OpenBioSystems (clone IDs: Zeb1, 40036600; Klf4, 5111134). Sequences of all primers are listed in supplementary material Tables S2-S5.

### Electroporation

Chick embryos (Hardy's Hatchery, Massachusetts, USA) were staged (Hamburger and Hamilton, 1951) and immobilized in filter paper for early culture (EC) (Chapman et al., 2001). DNA for electroporation was used at the following concentrations: ptkEGFP constructs, 750 ng/μl; pRFP, 50 ng/μl, all pCIR and pcDNA constructs, 1 μg/μl. Constructs were mixed with 0.01% Fast Green and injected between the vitelline membrane and the epiblast of HH3-4 embryos. Electroporation was carried out in Howard Ringers Solution (HR) in chambers containing a platinum plate below the embryo while holding a platinum electrode above, with five pulses of 6.5V (50 ms on, 100 ms off). Embryos were cultured at 38°C for 16-24 hours, fixed in freshly thawed 4% (w/v) paraformaldehyde for 30-45 minutes at room temperature, and rinsed in 0.1% Tween/PBS.

### In situ hybridization and immunohistochemistry

Whole-mount immunofluorescence and *in situ* hybridization of *Pax7* were performed as previously described (Basch et al., 2006). *cMyb* probes were generated from a full-length clone in pBS2SK+ vector (*XhoI*, T3; 1930 bp, hydrolyzed with bicarbonate), and a 429 bp terminal fragment (*BglII*, T3). Gelatin cryosections (8-12 μm, Leica CM1900 Cryostat), washed in warm 0.5× PBS, immersed in PBS and permeabilized in 0.1% Tween/PBS. Sections were blocked with 4% FBS before adding anti-Pax7 AB (1:50 mIgG1, Developmental Studies Hybridoma Bank). Secondary antibodies used were of specific isotypes conjugated to Alexa 568 or Alexa 488 (1:2000) (Invitrogen). Nuclei were stained with 0.5 mg/ml DAPI, and slides were coverslipped in Vectashield (Vector Laboratories).

Images were acquired using a SPOT SE camera and software using a Nikon Eclipse 80i microscope and processed in Adobe Photoshop.

### Site-directed mutagenesis

Site-directed mutagenesis was performed on P7eNPBE ptkEGFP using the standard protocol from QuikChange II Site-Directed Mutagenesis Kit (Stratagene), except PCR products were purified using QIAquick-PCR purification columns (Qiagen) prior to transformation.

### EMSA

Protein extracts were produced using EasyXpress Protein Synthesis Kit (Qiagen). DNA probes (*cMyb* wild-type sense, 5'-AAGAGCCAACAGCCCTCCCT; *cMyb* wt antisense, 5'-AGGGAGGGCTGTTGGCTCTT; mutated M2, 5'-AAGAGCCACACTAACTCCCT and 5'-AGGGAGTTAGTGTGGCTCTT) were biotinylated (Biotin 3' End Label Kit, Thermo Fisher Scientific), annealed at 98°C and slowly cooled to room temperature. EMSAs were performed using the LightShift Chemiluminescent-EMSA Kit (Thermo Fisher Scientific). Protein extracts (1/10 dilution) were mixed with 20 fmol labeled probe, 1× binding buffer (Thermo Fisher Scientific), 1 μg/ml salmon sperm DNA, 50% glycerol, 0.05% NP-40, 30 mM KCl, 5 mM MgCl<sub>2</sub> and 1 mM EDTA, and incubated at 4°C for 20 minutes. Competition assays with unlabeled competitor probes (100-400×) added sequentially were incubated as above.

## RESULTS

### Identification of putative enhancers of early Pax7 expression

In the chick embryo, *Pax7* expression is restricted to the NPB and early NC (Basch et al., 2006; Otto et al., 2006; Khudyakov and Bronner-Fraser, 2009). *Pax7* can be identified in late gastrula/early neurula stages emanating from the primitive streak, posterior to the node, in an anterior-ward diagonal pattern (Fig. 1F). At stages 6-7, *Pax7* is expressed in the NPB, in a broad domain excluded only from the anteriormost region of the NP (Fig. 1G). By stage 8, in addition to NFs and NPB, *Pax7* is also expressed in somites (Fig. 1H). Positive *Pax7* signal is detected in cranial dorsal neural tube and migrating NC at stage 10, and posterior signal (vagal, and trunk) is maintained in NFs, NPB and somites through stage 12 (Fig. 1I). Murine and human *Pax7* expression is also associated with early neural crest lineages (Jostes et al., 1990; Mansouri et al., 1996; Betters et al., 2010; Murdoch et al., 2012), and regulatory sequences controlling later *Pax7* expression have been identified (Murmah et al., 2000; Syagailo et al., 2002; Lang et al., 2003). However, no enhancer elements or TFs directly controlling its expression in the NPB/NC have been reported.

To identify putative enhancers replicating the early expression of *Pax7* in chick embryos, we focused on the genomic region upstream of *Pax7* transcriptional start site. We avoided the most proximal region, which displays considerable homology, because it failed to reveal early NPB activity in the mouse (Lang et al., 2003). Using VISTA browser (Visel et al., 2007), we identified sequences conserved between chick, human and mouse in a ~6 kb region of genomic DNA beginning ~10 kb upstream of chick *Pax7* (Fig. 1A). Enhancers are generally identified in conserved sequences; however, growing evidence advocates for conservation of regulatory function of genomic regions across species without sequence conservation or even common TF-binding sites (Ludwig et al., 2000; Romano and Wray, 2003; Ludwig et al., 2005; Fisher et al., 2006; Hare et al., 2008; Weirauch and Hughes, 2010; Swanson et al., 2011). Additionally, different species display slight variations in *Pax7* expression. Therefore, we aimed to analyze conserved and non-conserved sequences throughout the 6 kb region. To achieve this, we cloned 12 regions, covering 5870 bp (97.8%) of the targeted territory, and ranging in size from ~250 bp to ~700 bp

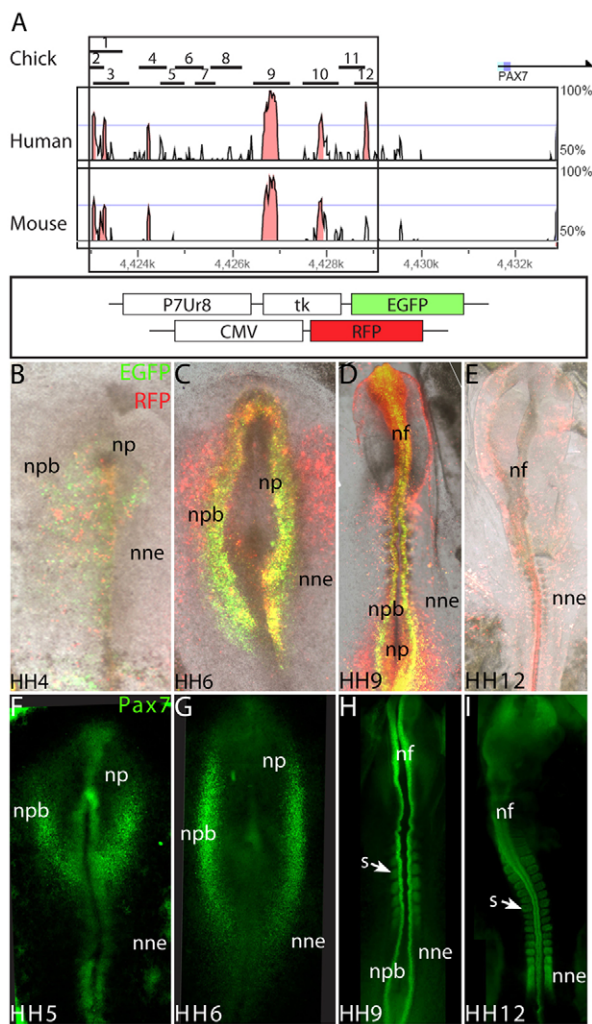

**Fig. 1. Enhancer P7Ur8 activates reporter expression in a neural crest-like pattern.** (A) VISTA plot of 12 kb from chicken chromosome 21, showing the percent identity (y-axis) between chicken-human (top) and chicken-mouse (bottom) sequences [conserved (>50% identity) non-coding peaks are highlighted in pink]. Position and relative size of 12 Pax7 upstream regions (P7Ur1 to P7Ur12) tested are numbered at the top of the plot. Each region was cloned in front of a weak promoter driving EGFP, and was co-electroporated with a ubiquitously expressed marker control (RFP). (B-E) P7Ur8-EGFP drives expression in a neural crest-like pattern. (B,C) P7Ur8-EGFP (green) is expressed as early as HH4-HH6 in the neural plate and neural plate border, but not in the NNE. (D) P7Ur8 is expressed in the neural plate, neural plate border and neural folds, but not in the NNE or somites through HH9. (E) By HH12, the oldest stage screened, P7Ur8 is no longer expressed. (F-I) Expression of Pax7 protein (green) is found in the neural plate border at HH5 (F) and later superimposes onto the neural folds (G-I). At HH9, somite expression of Pax7 is clearly visible (arrow, H). At HH12, Pax7 is expressed in the neural folds, somites (arrow) and presomitic mesoderm (I). np, neural plate; npb, neural plate border; nne, non-neural ectoderm; nf, neural folds; s, somites.

(Fig. 1A, labeled Pax7 Upstream regions, or P7Ur1 through P7Ur12). P7Ur8s were PCR amplified from chicken genomic DNA and inserted into the reporter construct ptkEGFP (Uchikawa et al., 2003). Enhancer reporter constructs were co-electroporated with an RFP marker plasmid (to determine electroporation extent) into the entire epiblast of Hamburger-Hamilton stage 3 (HH3) embryos and

cultured between 16 and 24 hours, until HH6-12. EGFP expression was compared with RFP marker electroporation and endogenous Pax7 from non-treated embryos (Fig. 1B-I).

Embryos electroporated with P7U regions 1-7 and 9-12 failed to reveal restricted expression at the stages analyzed (183 embryos analyzed,  $n \geq 8$  per construct). Instead, embryos electroporated with P7Ur8 (~700 bp) exhibited NPB/NC reporter expression (Fig. 1B-D,  $n=48$ ). Weak initial reporter activity driven by P7Ur8 can be identified at HH4 (Fig. 1B) distributed broadly in the central ectoderm; importantly, at this early stage reporter expression in prospective NPB territory matches endogenous Pax7. By HH6, reporter expression is seen in a broad NPB pattern excluded from the NNE and the more medial NP (Fig. 1C). At HH9, P7Ur8 replicates endogenous Pax7 expression in the NFs, and lacks expression in medial neural and lateral NNE, and somites. However, additional expression is seen in the anterior primitive streak and in the caudal open NP, although it seems excluded from most medial territories (Fig. 1D). By HH12, the oldest stage screened, P7Ur8 no longer expressed the reporter signal (Fig. 1E).

To further establish the distribution of the EGFP expression driven by P7Ur8, we sectioned HH9 embryos co-electroporated with the RFP control plasmid (Fig. 2A-D). We found marker RFP and P7Ur8-EGFP signal in the NFs (Fig. 2B,C). However, unlike the marker RFP, P7Ur8-EGFP showed little expression in more medial neural tissue, was absent from the most ventral regions of the neural tube and no signal was detected in mesodermal tissues (Fig. 2C,D). We noticed a graded P7Ur8-EGFP signal, being stronger at dorsal regions and weaker towards ventral regions of the neural tube. In the caudal open NP, adjacent and posterior to the node, expression driven by P7Ur8 can be detected in the NFs, and additional signal is seen in the early NP/stem zone and remaining primitive streak (Fig. 2A). Equivalent sections from embryos immunostained for Pax7 (Fig. 2E-G) demonstrate a similar P7Ur8-EGFP signal to that of endogenous Pax7 in early migrating NC and dorsal neural tube (Fig. 2E) in NFs (Fig. 2F) and in the NPB in more caudal regions (Fig. 2G). However, unlike endogenous Pax7, Pax7Ur8-signal is clearly absent from somites (Fig. 2F). Furthermore, we directly immunostained Pax7 in embryos electroporated with P7Ur8-EGFP and cultured until HH10, when Pax7 is expressed in the dorsal neural tube, pre-migratory and migratory neural crest, and in the somites (Fig. 2H). The merged whole-mount image displaying endogenous Pax7 (red) with the P7Ur8-EGFP signal (green) clearly reveals exclusive expression of endogenous Pax7 in the somites, where P7Ur8 does not report. Furthermore, cranial sections reveal robust P7Ur8-EGFP signal in early migratory NC and dorsal neural tube cells co-expressing Pax7, and a few ventral cells with much weaker EGFP signal (Fig. 2I-I').

These results suggest that the Pax7 upstream region P7Ur8 contains an enhancer element that is able to drive expression in a pattern similar to that of endogenous early Pax7 in the NPB, NF and early emigrating cranial NC, but does not elicit Pax7 expression in the mesodermal somites, nor does it sustain expression after HH12.

### Identification of essential elements for P7Ur8 enhancer activity

To identify the minimal elements necessary and sufficient for the enhancer activity within P7Ur8, we performed a deletion analysis (Fig. 3). A series of ~100 bp overlapping internal deletions was generated and the expression profile of the resulting constructs monitored by electroporation (Fig. 3A). Deletions 1 to 4 (bp 90-352) and 8 (bp 478-593) had no effect on the expression of P7Ur8



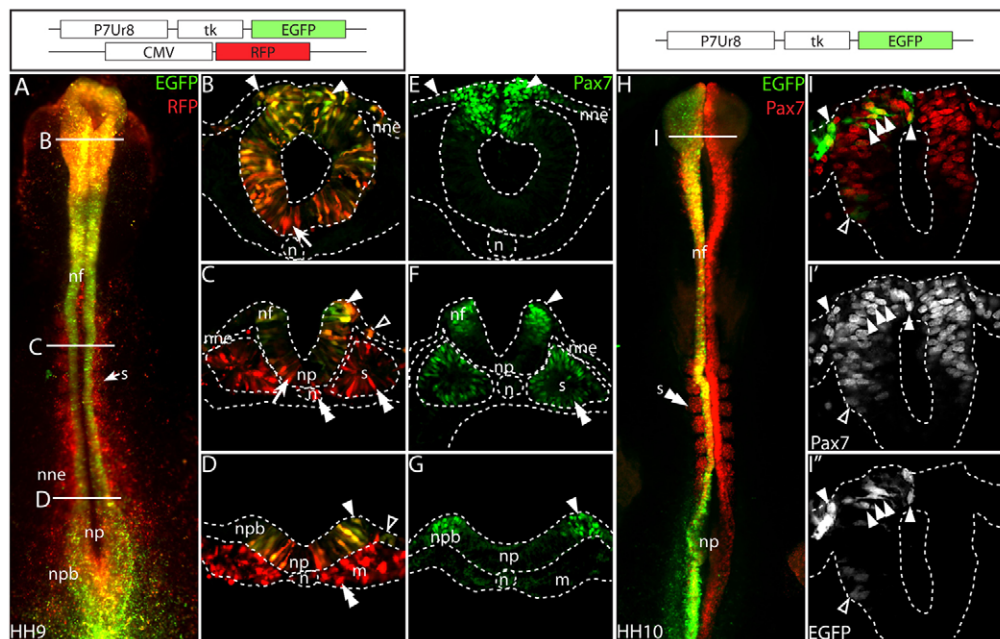

**Fig. 2. Enhancer P7Ur8 is co-expressed with Pax7 in the neural crest, but not in the somites. (A-D)** Co-electroporation of red-marker control and P7Ur8-EGFP reveal specific expression at HH9 in the dorsal most part of the neural tube (B, closed arrowheads) and neural folds (C and D, closed arrowheads), but not in the ventral neural tube (B, arrow) or neural plate (C, arrow). P7Ur8 is expressed in some NNE adjacent to the neural folds (C and D, open arrowheads), but is not expressed in the somites, the notochord (C, double arrowheads) or the pre-somitic mesoderm (D, double arrowhead). **(E-G)** Sections showing normal Pax7 expression (green) in a similarly staged embryo, in the tips of the forming neural folds (E,G, closed arrowheads), in the dorsal neural tube and in migrating NC (E), and in the somites (F, double arrowhead). **(H-I')** At HH10, P7Ur8 (green) is co-expressed with Pax7 protein (red). Cells in the dorsal neural tube strongly express P7Ur8 (I-H', closed arrowheads), whereas weak P7Ur8 expression is seen in more ventral cells (I'', open arrowheads). n, notochord; m, mesoderm; np, neural plate; npb, neural plate border; nne, non-neural ectoderm; nf, neural folds; s, somites.

(Fig. 3B); however, deletions 5-7 (bp 299-497) provided no reporter expression, suggesting high relevance for the intervening ~300 bp. However, removal of bp 251-352 from deletion 4 and bp 478-593 from deletion 8 had no effect on the expression, thus we proposed that the minimal elements necessary to drive expression of P7Ur8 are found in the 126 bp from 352 to 478. To specifically test this, we generated an additional deletion construct removing the intervening 130 bp between 350 and 480 (P7Ur8 $\Delta$ 9). As expected, this construct provided no reporter expression after electroporation (Fig. 3C).

Given that spacing of enhancer elements has been found to be essential for their function in some cases (Carey, 1998; Erives and Levine, 2004; Senger et al., 2004; Halfon, 2006), we replaced the deleted sequence in P7Ur8 $\Delta$ 9 with a random 130 bp sequence (P7Ur8 $\Delta$ 9S), re-establishing the original spacing of the flanking sequences. Similar to P7Ur8 $\Delta$ 9, P7Ur8 $\Delta$ 9S is unable to drive expression of EGFP (data not shown). To test whether the required 130 bp sequence is able to provide the reporter expression found in P7Ur8, we generated a construct inserting these 130 bp upstream of the tk promoter. When electroporated into chick embryos, this construct provides similar expression profile to the whole P7Ur8, demonstrating that this 130 bp sequence (termed Pax7 early neural plate border element, or P7eNPBE) is sufficient for enhancer activity during early developmental stages (Fig. 3D,E). To further limit the presence of relevant components within the P7eNPBE, we generated two smaller constructs. P7eNPBE $\Delta$ 1 (first 80 bp from P7eNPBE) was unable to elicit reporter activity. Instead, P7eNPBE $\Delta$ 2 (last 70 bp) efficiently reported enhancer activity, even in a single copy (Fig. 3E). This evidence suggests that within the 70 bp of P7eNPBE $\Delta$ 2 lies information necessary and sufficient for the early NPB/NC reporter expression originally identified in P7Ur8.

### Putative TF-binding sites necessary for P7eNPBE $\Delta$ 2

In order to identify possible TF-binding sites involved in the regulation of P7eNPBE $\Delta$ 2, we used the JASPAR database (Bryne et al., 2008), and found over 50 possible TFs that could bind more than a 100 recognition DNA-binding sites. To restrict this list, we generated eight 6-7 bp mutations, with each eliminating several potential binding sites. Mutated versions (M1 to M8) of the P7eNPBE were cloned into ptkEGFP, while the wild-type P7eNPBE enhancer was cloned upstream of the tk promoter driving mCherry. Co-electroporation of these constructs enables direct comparison and identification of possible effects triggered by the mutations. All of the mutations revealed some effect on enhancer activity (supplementary material Fig. S1). M2, M3 and M8 completely eliminated activity at all stages tested (supplementary material Fig. S1B-C'); M1 retained the spatiotemporal activity, but the robustness of expression, both in terms of intensity of signal and number of cells expressing the enhancer, was variable (supplementary material Fig. S1D-E'); M4-6 retained activity only before HH8 (supplementary material Fig. S1F-G'); and M7 retained activity only after HH8 (supplementary material Fig. S1H-I'). Fig. 4 provides two examples of mutated reporter expression: prior to HH8 there is almost unperturbed expression from M4 (yellow sequence Fig. 4A,B); conversely, M2 completely abrogated reporter expression (gray sequence Fig. 4A,C,C'). The fact that so many of the bases are crucial for the activity of P7eNPBE, and that the effects can be stage specific, indicates that the regulation of this enhancer element is complex and dynamic. It seems unlikely that one factor alone could fully regulate Pax7 expression, and instead these results suggest that multiple TFs recognizing the affected

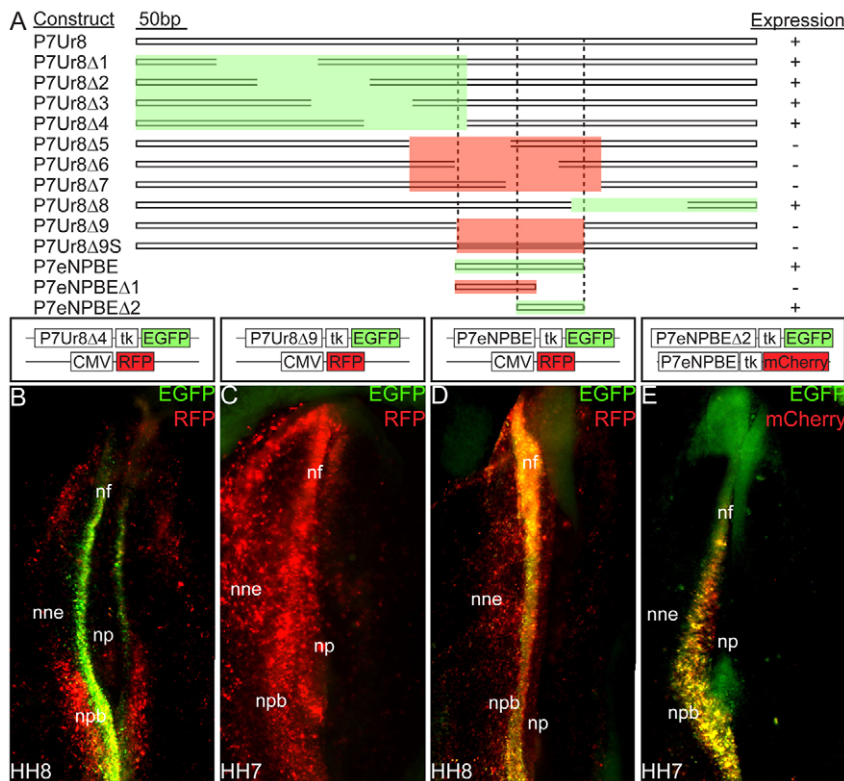

**Fig. 3. Deletion analysis identifies the minimal element necessary and sufficient for the enhancer activity of P7Ur8.** (A) Summary of the structure and activity of each deletion construct. Constructs highlighted in green retained enhancer activity, whereas constructs highlighted in red did not. (B-E) Examples of constructs with (B,D,E) and without (C) enhancer activity. np, neural plate; npb, neural plate border; nne, non-neural ectoderm; nf, neural folds.

sequences contribute in an important way to Pax7 regulation. Because all the mutations were found to be crucial in at least some fashion for the expression of P7eNPBE, and that many of the binding sites are overlapping, we decided to take a candidate approach to further analyze this element.

### cMyb, but not ETS1, Klf4 or Zeb1, can regulate expression from the P7eNPBE

To restrict the list of putative TFs that could regulate Pax7 suggested through our mutagenesis effort (supplementary material Table S1), we focused on a few attractive candidates. *cMyb* mRNA and protein blots have been reported in chick as early as HH4 (Karafiat et al., 2005). At HH6, *cMyb* is expressed in the NPB, and at HH8-9 is expressed in dorsal NFs and migrating neural crest (Betancur et al., 2010a). *Ets1* is expressed in cranial neural crest cells at HH8, prior to emigration (Tahtakran and Selleck, 2003). *Zeb1* is expressed in the cranial neural crest and neural crest derivatives (Funahashi et al., 1993; Takagi et al., 1998). *Klf4* is expressed in prospective NP at HH4 and at HH8-9 is in the NFs and neural tube (Antin et al., 2010).

To test the effect of these candidate TFs on enhancer activity, we co-electroporated HH3 embryos with the P7eNPBE reporter and constructs ectopically expressing each gene. Expression of each protein was confirmed by western blot (data not shown). Ectopic expression of Klf4 ( $n=25$ ; Fig. 4D), Zeb1 and ETS1 ( $n=20$  and  $n=11$ ; supplementary material Fig. S2D,E) had no effect on the activity of P7eNPBE, which was found in its normal distribution in the NFs. Instead, ectopic expression of cMyb disrupted the enhancer activity of P7eNPBE (Fig. 4E-G'). After incubation, the majority of embryos receiving cMyb and P7eNPBE displayed reduced expression the NFs ( $n=14/17$ ) with a residual 'salt and pepper' activation pattern. Additionally, *cMyb* overexpression led to ectopic signal in the NP ( $n=37/49$ ) and the

NNE ( $n=47/51$ ) (Fig. 4E-G), but did not trigger mesodermal expression (Fig. 4G,G').

To further test whether cMyb could regulate Pax7 expression through the P7eNPBE enhancer, we tested the capacity of cMyb to bind to this regulatory element *in vitro* through an electrophoretic mobility shift assay (EMSA, Fig. 4H). These experiments identified a shift of the labeled wild-type probe (lane 1) generated by an *in vitro* translated cMyb protein (38% bound probe, lane 2), outcompeted by excess unlabeled wild-type probe (2% bound probe, lane 3) but not by unlabeled mutated-M2 probe (31% bound probe, lane 4). Furthermore, labeled mutated-M2 probe (lane 5) displays a much weaker binding by cMyb (8%, lane 6) in comparison with that bound to the wild-type probe.

Overexpression and EMSA analyses support a possible role for *cMyb* in Pax7 regulation through the P7eNPBE. At HH6, *cMyb* is expressed in the NPB (Betancur et al., 2010a) along with Pax7; however, its earlier spatial distribution has not been established, a premise for its participation in early Pax7 regulation. To achieve this, we performed *in situ* hybridization with two antisense probes for *cMyb* (full length and 300 bp) in gastrula embryos prior to Pax7 expression. No specific signal was seen with corresponding sense control probes (not shown). Instead, in *cMyb* seems broadly expressed in the early ectoderm of HH3-4 embryos (Fig. 4I), confirming reported northern and western blots (Karafiat et al., 2005), and providing further support for the possible participation of *cMyb* in Pax7 regulation.

*cMyb* and *ETS1* are known to cooperate in many different contexts (Dudek et al., 1992; McCracken et al., 1994; Melotti and Calabretta, 1994; Melotti et al., 1994; Postigo et al., 1997; Ratajczak et al., 1998; Brabletz et al., 1999; Betancur et al., 2010a). As there are *ETS1* sites present in P7eNPBEΔ2, we tested the possible cooperation between *ETS1* and *cMyb* to regulate P7eNPBE. To achieve this, we simultaneously electroporated both constructs and

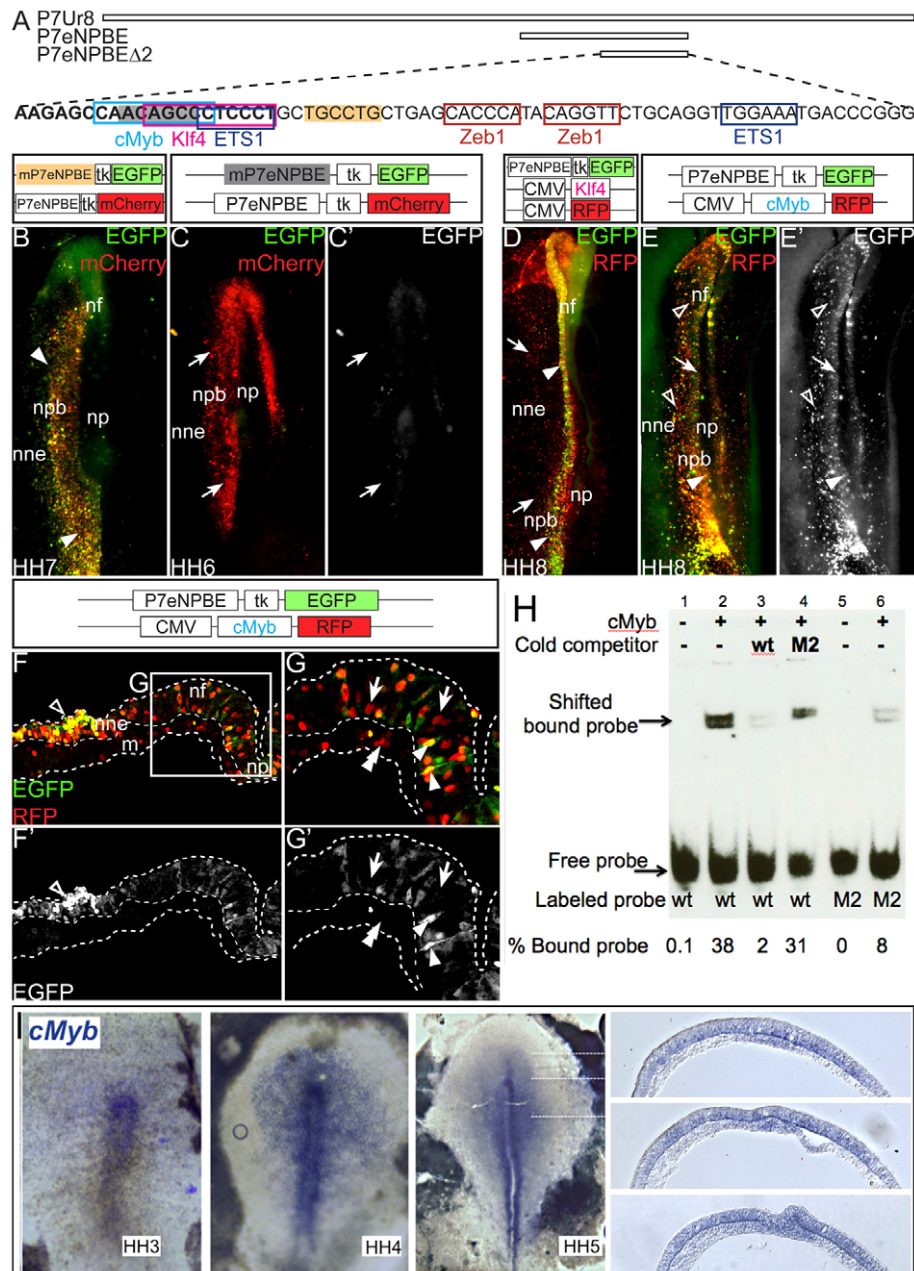

**Fig. 4. The transcription factor cMyb is crucial for the enhancer activity of P7eNPBE.** (A) Position size and sequence of the enhancer P7eNPBE $\Delta$ 2 in comparison with P7Ur8 and P7eNPBE. (B-C') Putative DNA-binding sites of four selected TFs shown in colored boxes (cMyb, light blue; Klf4 pink; ETS1, dark blue; Zeb1, red). Two examples of mutated areas are indicated, with yellow for unaltered (B, arrowheads) and gray for abrogated (C,C', arrows) reporter expression. (D-G') These TFs were electroporated to assess effect on P7eNPBE enhancer activity. (D) Overexpression of Klf4 (red) led to normal P7eNPBE-EGFP expression in neural folds and neural plate border (arrowheads) and to exclusion from the NNE (arrows). (E-G') cMyb (red) overexpression led to reduced P7eNPBE-EGFP signal in the neural folds (E-E', arrow) with residual salt and pepper patterns, and expansion in the NNE (E-E', open arrowheads). (F-G') Sections of a similarly treated and staged embryo showing P7eNPBE expression in the NNE (open arrowheads, F,F') and neural plate (arrowheads, G). P7eNPBE-EGFP is not ectopically activated in the mesoderm (double arrowheads G) and is much reduced in the neural folds, but displays a 'salt and pepper' pattern, with some cells lacking (arrows), and others presenting, expression (arrowheads) (compare with Fig. 2C,D). (H) EMSA performed using a 20 bp probe (bold sequence in A) containing the wild-type cMyb-binding site or the M2 mutated version. When cMyb is added, it binds to the wild-type probe, generating a clear shift (lane 2 ~38% bound probe), which is severely reduced when cold unlabeled wild-type probe is added (lane 3, ~2%); instead, adding the same excess amount of cold unlabeled mutated M2 probe still displays a robust shift (lane 4, ~31%); however, only 8% of the labeled mutated-M2 probe is bound by cMyb (lane 6). (I) cMyb is expressed in the early ectoderm of chick embryos prior to *Pax7*. Whole mount *in situ* hybridization on HH3-5 chick embryos. Dotted lines at HH5 indicate sections shown on the left. m, mesoderm; np, neural plate; npb, neural plate border; nne, non-neural ectoderm; nf, neural folds.

the reporter P7eNPBE, and examined for enhancer activity (supplementary material Fig. S2E,E'). As with cMyb alone, the enhancer expression is no longer restricted from the NNE ( $n=6/7$ )

and appears in a reduced and 'salt and pepper' pattern in the NFs ( $n=5/6$ ) and NP ( $n=3/5$ ). This result suggests that ETS1 does not modify the activity of cMyb on P7eNPBE.



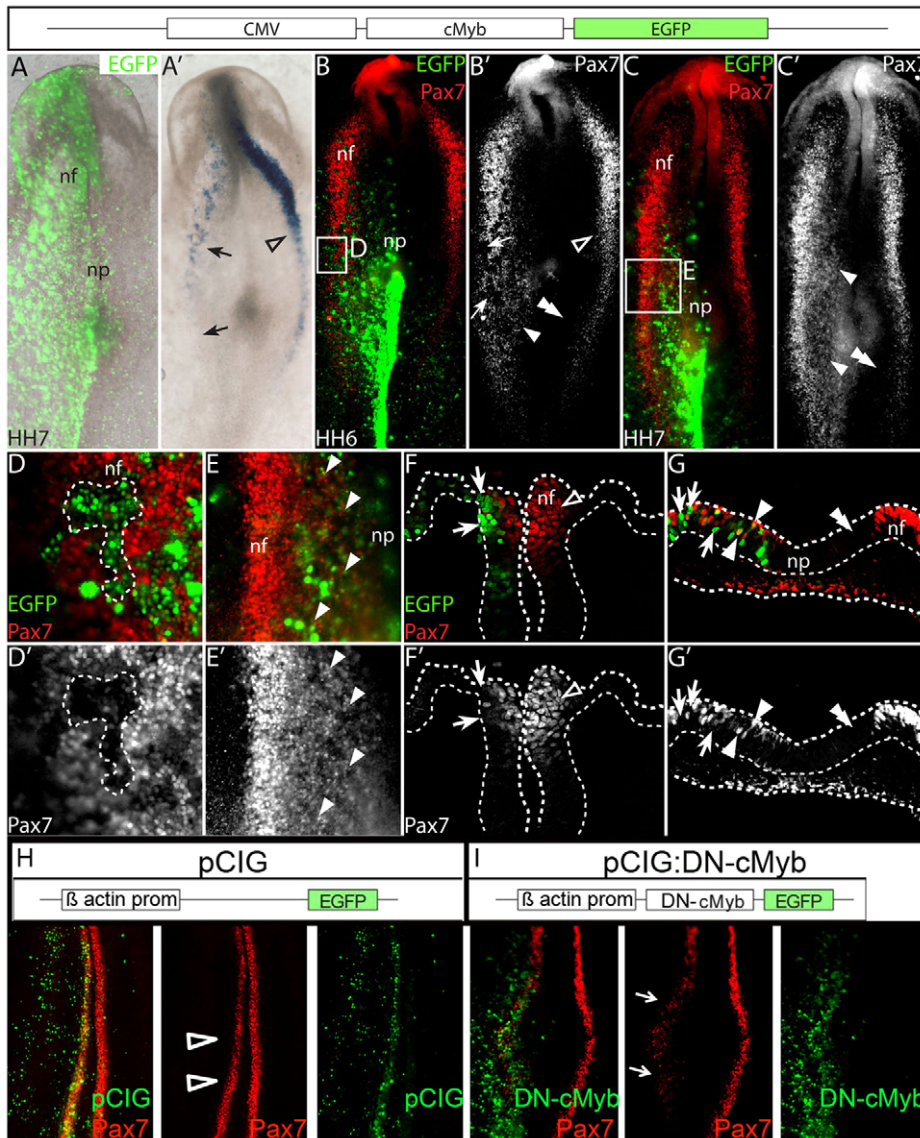

**Fig. 5. Endogenous Pax7 mRNA and protein respond to cMyb modulation.**

The effect of cMyb overexpression was analyzed on endogenous Pax7 mRNA and protein. (A,A') cMyb overexpression (green) leads to reduced levels of Pax7 mRNA (blue) in electroporated neural folds (A', arrows) compared with untreated neural folds (open arrowhead). (B-G') Similar neural fold reduction of Pax7 protein (red) is seen upon cMyb overexpression (green) (B',F',G', arrows; D,D', outlined) compared with untreated neural folds (B',F', open arrowheads). Overexpression of cMyb in the neural plate instead leads to Pax7 ectopic expression (B',C',E',G', arrowheads) compared with untreated neural plates (B',C',G,G', double arrowheads). Neither mRNA nor protein was expanded into the NNE. (H,I) Electroporation of pCIG empty vector control has no effect on Pax7 expression (H, open arrowheads); instead, the dominant-negative cMyb (DN-cMyb) construct leads to robust downregulation of endogenous Pax7 expression (I, arrows). np, neural plate; nf, neural folds.

### Ectopic cMyb modulates endogenous Pax7 expression in the neural folds

To establish whether cMyb could also control endogenous expression of Pax7, we ectopically expressed cMyb and then examined both Pax7 mRNA and protein expression (Fig. 5). Similar to the effect seen for the P7eNPBE, when cMyb is ectopically expressed, the levels of Pax7 mRNA are reduced in the NPB/NFs ( $n=4/7$ ) (Fig. 5A'), and ectopic Pax7 expression was seen in the NP ( $n=3/8$ , not shown). However, no expansion into the NNE was observed ( $n=0/8$ ). The effect of cMyb on Pax7 protein revealed an analogous pattern: ectopic cMyb lead to reduced Pax7 protein in NFs (Fig. 5B,B',D,D',F-G',  $n=24/33$ ) with expanded levels in the NP ( $n=24/31$ ) (Fig. 5B-C',D-E',G,G'), whereas they rarely generated ectopic Pax7 expression in the NNE ( $n=3/23$ , not shown).

Given the reported interactions between cMyb and ETS1, and despite our lack of evidence for ETS1 modulation of the P7eNPBE, we decided to test their possible combinatorial effect on endogenous Pax7 expression. ETS1-electroporated embryos showed normal Pax7 mRNA distribution ( $n=4$ ) (supplementary material Fig. S3B'), and co-electroporation of ETS1 and cMyb generated patterns seen with cMyb alone ( $n=6$ ) (supplementary material Fig. S3C'). These

results strongly suggest that ETS1 does not interact with cMyb to regulate early Pax7 expression.

To further assess the possible role of cMyb in Pax7 regulation, we turned to a previously reported dominant-negative approach (Kim et al., 2009; Kim et al., 2008; Lee et al., 2008; Taylor et al., 1996; Yi et al., 2002). cMyb contains a DNA-binding domain (DBD) on the N terminus, followed by a transactivation domain (TAD) and a negative regulatory domain (NRD) (Pattabiraman and Gonda, 2013; Ramsay and Gonda, 2008). The dominant-negative cMyb (DNcMyb) consists exclusively of the DBD; removing the TAD and the NRD is thought to prevent much of the protein-protein interactions of cMyb. We PCR amplified the DBD of cMyb and cloned it into pCIG, a vector with an IRES-EGFP. Then we performed unilateral electroporations (contralateral side serving as internal control) in HH3 chick embryos with either pCIG control or DNcMyb. Although control embryos displayed even numbers of Pax7<sup>+</sup> cells on either side ( $n=5$ , Fig. 5H), a robust reduction of Pax7<sup>+</sup> cells (>50% average) was found in the electroporated side in 9 out of 10 embryos treated with DNcMyb (Fig. 5I). These results support a role for cMyb in modulating Pax7, and suggest it operates as an activator.

## DISCUSSION

### P7eNPBE directs expression in prospective neural crest

We have identified a novel enhancer of *Pax7* that is able to drive expression associated with early NC development. The reporter expression generated by P7eNPBE marks the NPB, becomes restricted to the NFs and early migratory NC, locations in which the reporter is co-expressed with endogenous *Pax7*. Unlike endogenous *Pax7*, P7eNPBE-driven expression fades after HH12 and never appears in somites, supporting a specific NPB-early NC character for this enhancer. Despite the striking similarity to the endogenous NC-related *Pax7* expression, a few deviations were noted. At HH4-5, the weak initial expression is unrestricted, and can be found in medial prospective NP and lateral NNE. Additional low-level P7eNPBE and P7Ur8-driven expression can be detected in more medial/ventral NP. These differences could easily be due to the lack of repressor elements in the P7eNPBE and P7Ur8 constructs. Further restriction of endogenous *Pax7* expression is achieved by miRNAs that regulate the translation and degradation of *Pax7* mRNA (Chen et al., 2010; Dey et al., 2011). The lack of these responsive elements in our constructs could account for some of the minor discrepancies. Overall, this small enhancer element reports accurately in the early NPB and early NC.

The P7eNPBE enhancer displays little sequence similarity to human but no homology to murine sequences, and thus highlights the importance of screening beyond highly conserved regions. Furthermore, there is growing evidence for the conservation of regulatory function of genomic regions across species in the absence of sequence conservation or even common TF-binding sites (Ludwig et al., 2000; Romano and Wray, 2003; Ludwig et al., 2005; Fisher et al., 2006; Hare et al., 2008; Weirauch and Hughes, 2010; Swanson et al., 2011). Therefore, functionally equivalent elements to P7eNPBE might exist in other species without obvious sequence similarity. Alternatively, the P7eNPBE enhancer could represent a regulatory element that is unique to chick. Slight variations in the expression of *Pax7* have been reported in different organisms (Bang et al., 1999; Monsoro-Burq et al., 2005; Sato et al., 2005; Basch et al., 2006; Hong and Saint-Jeannet, 2007; Minchin and Hughes, 2008; Khudyakov and Bronner-Fraser, 2009; Betters et al., 2010; Maczkowiak et al., 2010; de Crozé et al., 2011). Human embryonic expression of *Pax7* in dorsal neural tube and migrating NC has only been reported in relatively later stages and at trunk levels (Betters et al., 2010); however, the lack of earlier more anterior samples prevents equivalent comparison with the early NPB of the chick embryo. In the mouse, expression studies based on *in situ* hybridization had suggested that *Pax7* expression started after neural tube closure at embryonic day 8 (Jostes et al., 1990; Mansouri et al., 1996). However, recent immunofluorescence analysis indicates that *Pax7* appears earlier, in open NFs of the cranial region at embryonic day 7.5 (Basch et al., 2006; Murdoch et al., 2012). Preliminary work from our group supports functional conservation with limited sequence conservation between the equivalent P7eNPBE from human and chick (data not shown). Further studies will be necessary to establish whether this element is conserved in other species.

### The regulatory elements of *Pax7* in mammals

Previous studies of human and mouse *Pax7* regulatory elements have not yielded information regarding early NPB development (Murrmann et al., 2000; Sygailo et al., 2002; Lang et al., 2003). However, studies of the regulation of *Pax3* in the mouse have been more successful, revealing several elements capable of driving reporter expression in endogenous early NPB/NC territories.

Furthermore, specific TFs and their binding sites have been identified, and include direct and indirect Wnt-responsive elements (Natoli et al., 1997; Milewski et al., 2004; Pruitt et al., 2004; Degenhardt et al., 2010; Sanchez-Ferras et al., 2012). The exploration of the direct and indirect links between FGF, BMP and Wnt signals known to regulate *Pax7* expression and the P7eNPBE remain to be tested.

### Large pool of putative *Pax7* regulators derived from the P7eNPBE mutagenesis

Our enhancer element analysis uncovered a small sequence that is rich in TF-binding sites (>100); the mutagenesis performed in these sequences identified several of them as essential for the reporter function, thus many putative TFs could modulate the expression from the element here identified (supplementary material Table S1). From these, we focused on a small list of candidates, and identified a clear role for *cMyb* in regulating *Pax7* expression. We suggest that *cMyb* is a key factor capable of regulating *Pax7* transcription in the NPB and early NC through the P7eNPBE. Our analysis of other candidates, including KLF4, Zeb1 and ETS1, failed to identify their participation in P7eNPBE regulation. Therefore, a major task for the future will be to identify and characterize the interactions of TFs that bind this element and cooperate to modulate *Pax7* expression in the early NPB and NC.

### *cMyb* is a novel regulator of *Pax7* expression in the chick

*cMyb* was first identified as the cellular counterpart to the *v-myb* oncogenes found in the avian acute leukemia viruses AMV and E26 (Klempnauer et al., 1982; Gonda and Bishop, 1983). Studies in hematopoietic cells have shown that *cMyb* controls proliferation, differentiation and survival, and is associated with stem cell regulation (Gewirtz and Calabretta, 1988; Mucenski et al., 1991; Ramsay et al., 1992; Walker et al., 1998; Weston, 1998; Oh and Reddy, 1999; Sun et al., 2008; Papathanasiou et al., 2010; Cheasley et al., 2011). In chick embryos, *cMyb* directly binds to a regulatory element that controls *Sox10* expression in the NFs (Betancur et al., 2010a). Previous studies showed that *cMyb* modulates the expression of *Msx1*, *Slug* and *c-Kit* during NC development (Karafiat et al., 2005; Karafiat et al., 2007). However, no direct interaction or regulatory elements were originally reported. More recently, a non-NC study using embryonic kidney, colon carcinoma, neuroblastomas and leukemia-blast cells identified a regulatory element recognized by *cMyb* controlling the expression of *Snail2* and evocating an epithelial to mesenchymal transformation (Tanno et al., 2010). Collectively, these studies support an important role for *cMyb* within the NC-GRN.

Our results identify an essential role for a putative *cMyb*-binding site for P7eNPBE-driven expression, and we show that *cMyb* can bind to this sequence. We also demonstrate expression of *Myb* prior to *Pax7* and distinct effects of *cMyb* overexpression on P7eNPBE and endogenous *Pax7*. Finally, through a DN-*cMyb* construct, we reduced endogenous *Pax7* expression. These results suggest that *cMyb* directly regulates *Pax7* in a positive manner in the NPB, and is one of the earliest TFs that modulates neural crest development in chick embryos.

### A balancing act of *cMyb* regulates the NPB expression of *Pax7* in the early chick ectoderm

*cMyb* can activate or repress targets aided by other TFs and distinct co-factors including FLASH, p100, Mi-2 $\alpha$ , Menin, CBP/p300, Mybp1a, N-CoR, mSin3a, c-Ski, Tif-1 $\beta$ , etc. (Emambokus et al.,



2003; Pattabiraman and Gonda, 2013; Ramsay and Gonda, 2008). Even when associated with p300, a co-factor traditionally seen as a co-activator, cMyb can function as activator or repressor (Zhao et al., 2011). Therefore, cMyb alterations trigger complex and context-dependent outputs.

Here, we have identified a putative cMyb DNA-binding site essential for the expression of the P7eNPBE, suggesting that cMyb may activate Pax7 early expression at the NPB. We showed sequence-specific binding of cMyb to this site, and that cMyb is expressed in the early ectoderm. If the role of cMyb is to activate Pax7 expression, one would expect that a loss-of-function approach should reduce endogenous Pax7 expression, precisely what we observed with our DN*cMyb*. These results strongly suggest that *cMyb* acts as a positive regulator of Pax7 expression in the early NPB.

Experiments in which P7eNPB reporter expression, Pax7 mRNA and Pax7 protein were clearly modulated by electroporation of full-length cMyb lend further support to the idea that cMyb is involved in Pax7 regulation through the P7eNPBE. However, the results are complex; instead of the anticipated increased expression, we observed an unexpected general reduction requiring a more elaborate explanation. Perhaps excess levels of cMyb antagonize its positive regulation of Pax7 via ‘squenching’ (Ptashne, 1988) of partner transcription factors and/or co-factors. Similar effects have been reported for Pax6, Stat5, VP16 and Sox2 among many other TFs (Boer et al., 2007; Czerny and Busslinger, 1995; Fischer and Gessler, 2007; Luo and Yu-Lee, 2000). Additionally, we observed

residual ‘salt and pepper’ expression in the NPB. We suggest that most cells in the NPB already express cMyb, and electroporation leads to excessive levels, which could sequester partners away from the enhancer element (squenching). Occasional occupancy of the enhancer by cMyb and its partners could explain the residual salt and pepper pattern. Importantly, the expression of most NPB markers is not homogeneous, we have noted heterogeneous expression of most TFs associated with NC development in the NPB of chick, mouse, rabbit and human embryos. Therefore, salt and pepper expression could occur in the few cells where original cMyb-levels were low and reached appropriate levels after electroporation.

We suggest that, in the NP and the NNE, which normally have lower cMyb levels than the NPB (Betancur et al., 2010a), cMyb overexpression leads to ‘functional’ cMyb levels, favoring activation. Accordingly, we see ectopic reporter and Pax7 expression in the NP, suggesting that here cMyb is a limiting factor. Instead, in the NNE only the reporter was ectopically activated. Thus, negative regulators (transcription repressors or miRNAs) absent in the reporter may prevent ectopic expression of endogenous Pax7.

Based on this analysis, we propose a model for Pax7/P7eNPBE regulation in the early chick ectoderm (Fig. 6), where binding of cMyb and its partners is crucial for Pax7 and reporter expression (Fig. 6A). Mutagenesis of the P7eNPBE revealed the requirement of several sequences that could respond to several TFs. Among them we identify a crucial role for the DNA recognition site of

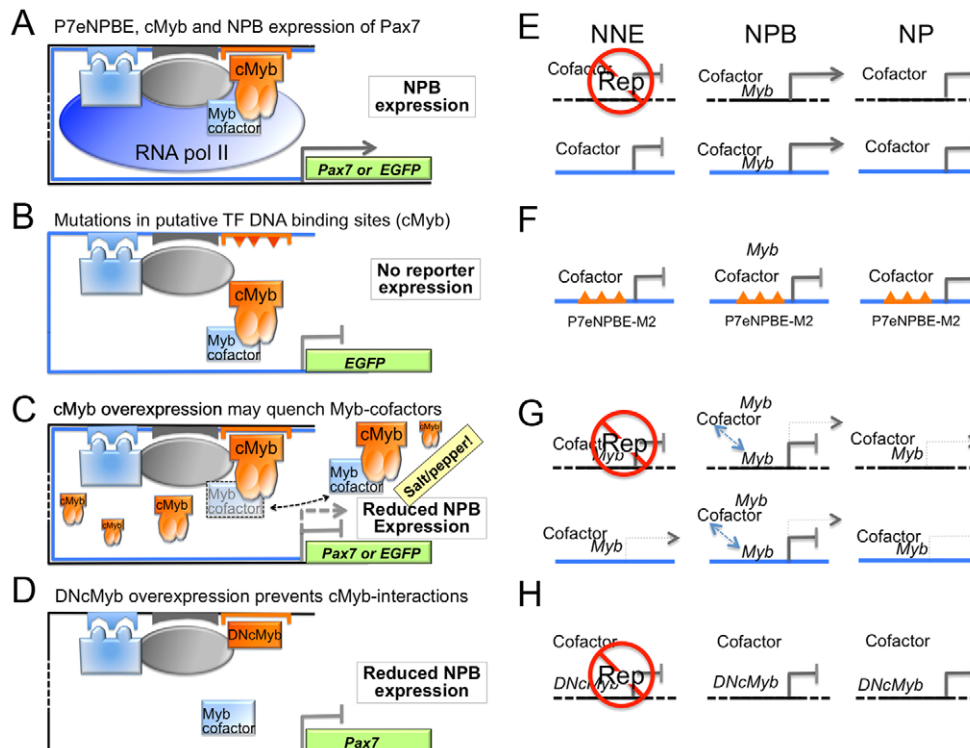

**Fig. 6. cMyb Effect of cMyb on ectodermal regulation of Pax7 expression through the P7eNPBE.** (A) cMyb interacts with a sequence-specific DNA-binding site at the P7eNPBE to control Pax7 expression positively in the NPB of early embryos. (B) Mutation of the cMyb DNA-binding site prevents reporter expression. (C) Overexpression of cMyb quenches Myb co-factors, leading to global NPB downregulation with residual salt and pepper expression. (D) DN*cMyb* overexpression prevents cMyb co-factor(s) interactions and assembly at the enhancer, blocking Pax7 expression. (E-H) Context-dependent expression in the NNE, NPB and NP: components and interactions. A repressor mechanism absent from the reporter is proposed to prevent expression in the NNE (red circle, E,G,H). Myb co-factor(s) are broadly expressed, while the initial broad expression of cMyb becomes restricted to the NPB (Betancur et al., 2010a). Genomic Pax7 and P7eNPBE are indicated by black and blue lines, respectively.

cMyb (Fig. 6B). Overexpression of cMyb leads to downregulation of Pax7 and enhancer activity at the NPB due to squelching, with residual salt and pepper patterns due to occasional occupancy at the enhancer (Fig. 6C). DNcMyb overexpression instead triggered a reduction of Pax7 expression (Fig. 6D). We further suggest that context-dependent partners and/or mechanisms of repression (repressor TFs or miRNA-dependent regulation) could account for the behaviors seen in NNE, NPB and NP (Fig. 6F-I).

### Murine Myb proteins and NC

cMyb-null mice display phenotypes related to hematopoietic development without any obvious effects on NC (Sitzmann et al., 1995; Mucenski et al., 1991). However, the close relative B-Myb is ubiquitously expressed and recognizes near identical sequences to those recognized by c-Myb. Although different functions and targets have been identified for cMyb and B-Myb (Rushton et al., 2003), B-Myb has been shown to experimentally modulate targets in undistinguishable fashion to cMyb, and is likely to share some transcriptional targets *in vivo* (Prouse and Campbell, 2012; Ramsay and Gonda, 2008). Importantly, cMyb and B-Myb have been reported to function redundantly in myeloid cells (Golay et al., 1997). B-Myb-null animals die before gastrulation (Tanaka et al., 1999), preventing any NPB/NC analysis. Therefore, the function of Myb proteins in murine NC development remains to be tested. Interestingly, a non-coding mutation affecting the binding of cMyb to a regulatory element of Zeb1 leads to craniofacial defects, including cleft palate (Kurima et al., 2011).

### Concluding remarks

The early expression of Pax7 in the avian early ectoderm is sharply restricted to the NPB; later on, Pax7 is maintained in NC precursors and in early migratory NC, and is also expressed in mesoderm precursors. We recently have shown that FGF signaling can modulate Pax7 in the early chick ectoderm (Stuhlmiller and García-Castro, 2012a; Yardley and García-Castro, 2012). Among putative effectors of FGF/ERK signaling are the ETS TFs. We overexpressed ETS1 but were unable to identify any effects and thus FGF effectors modulating Pax7 expression remain to be identified. Although additional work is necessary to establish the precise components and arrangements of the active Pax7 enhancer in the NPB, here we have identified a regulatory element capable of reporting in the NPB in a fashion similar to that displayed by Pax7, and have demonstrated the participation of cMyb in the regulation of the isolated enhancer, and of endogenous Pax7.

### Acknowledgements

We thank all past and present members of the M.I.G.-C. laboratory for comments on the manuscript, and H. Kondoh and T. Sauka-Spangler for constructs.

### Funding

This work was funded by the National Institutes of Health (NIH) [RO1DE017914 to M.I.G.-C. and NIH Genetics Predoctoral Training Grant 2T32GM007499 to S.V.]. Deposited in PMC for release after 12 months.

### Competing interests statement

The authors declare no competing financial interests.

### Author contributions

M.I.G.C. and S.V. designed the study. S.V. performed most experiments; J.M., M.T., N.A.S. and M.I.G.C. completed additional experiments. S.V. and M.I.G.C. analyzed results, interpreted data and wrote the manuscript.

### Supplementary material

Supplementary material available online at <http://dev.biologists.org/lookup/suppl/doi:10.1242/dev.088328/-/DC1>

### References

- Antin, P. B., Pier, M., Sesepasara, T., Yatskevych, T. A. and Darnell, D. K. (2010). Embryonic expression of the chicken Krüppel-like (KLF) transcription factor gene family. *Dev. Dyn.* **239**, 1879-1887.
- Bang, A. G., Papalopolu, N., Goulding, M. D. and Kintner, C. (1999). Expression of Pax-3 in the lateral neural plate is dependent on a Wnt-mediated signal from posterior nonaxial mesoderm. *Dev. Biol.* **212**, 366-380.
- Basch, M. L., Bronner-Fraser, M. and García-Castro, M. I. (2006). Specification of the neural crest occurs during gastrulation and requires Pax7. *Nature* **441**, 218-222.
- Betancur, P., Bronner-Fraser, M. and Sauka-Spangler, T. (2010a). Genomic code for Sox10 activation reveals a key regulatory enhancer for cranial neural crest. *Proc. Natl. Acad. Sci. USA* **107**, 3570-3575.
- Betancur, P., Bronner-Fraser, M. and Sauka-Spangler, T. (2010b). Assembling neural crest regulatory circuits into a gene regulatory network. *Annu. Rev. Cell Dev. Biol.* **26**, 581-603.
- Bettters, E., Liu, Y., Kjaeldgaard, A., Sundström, E. and García-Castro, M. I. (2010). Analysis of early human neural crest development. *Dev. Biol.* **344**, 578-592.
- Boer, B., Kopp, J., Mallanna, S., Desler, M., Chakravarthy, H., Wilder, P. J., Bernadt, C. and Rizzino, A. (2007). Elevating the levels of Sox2 in embryonal carcinoma cells and embryonic stem cells inhibits the expression of Sox2:Oct-3/4 target genes. *Nucleic Acids Res.* **35**, 1773-1786.
- Bolande, R. P. (1997). Neurocristopathy: its growth and development in 20 years. *Pediatr. Pathol. Lab. Med.* **17**, 1-25.
- Brabletz, T., Jung, A., Hlubek, F., Löhberg, C., Meiler, J., Suchy, U. and Kirchner, T. (1999). Negative regulation of CD4 expression in T cells by the transcriptional repressor ZEB. *Int. Immunol.* **11**, 1701-1708.
- Briscoe, J., Chen, Y., Jessell, T. M. and Struhl, G. (2001). A hedgehog-insensitive form of patched provides evidence for direct long-range morphogen activity of sonic hedgehog in the neural tube. *Mol. Cell* **7**, 1279-1291.
- Bryne, J. C., Valen, E., Tang, M. H., Marstrand, T., Winther, O., da Piedade, I., Krogh, A., Lenhard, B. and Sandelin, A. (2008). JASPAR, the open access database of transcription factor-binding profiles: new content and tools in the 2008 update. *Nucleic Acids Res.* **36**, D102-D106.
- Buckingham, M. and Relaix, F. (2007). The role of Pax genes in the development of tissues and organs: Pax3 and Pax7 regulate muscle progenitor cell functions. *Annu. Rev. Cell Dev. Biol.* **23**, 645-673.
- Butali, A., Suzuki, S., Cooper, M. E., Mansilla, A. M., Cuenco, K., Leslie, E. J., Suzuki, Y., Niimi, T., Yamamoto, M., Ayanga, G. et al. (2013). Replication of genome wide association identified candidate genes confirm the role of common and rare variants in PAX7 and VAX1 in the etiology of nonsyndromic CL(P). *Am. J. Med. Genet. A* **161**, 965-972.
- Carey, M. (1998). The enhanceosome and transcriptional synergy. *Cell* **92**, 5-8.
- Chapman, S. C., Collignon, J., Schoenwolf, G. C. and Lumsden, A. (2001). Improved method for chick whole-embryo culture using a filter paper carrier. *Dev. Dyn.* **220**, 284-289.
- Cheasley, D., Pereira, L., Lightowler, S., Vincan, E., Malaterre, J. and Ramsay, R. G. (2011). Myb controls intestinal stem cell genes and self-renewal. *Stem Cells* **29**, 2042-2050.
- Chen, J. F., Tao, Y., Li, J., Deng, Z., Yan, Z., Xiao, X. and Wang, D. Z. (2010). microRNA-1 and microRNA-206 regulate skeletal muscle satellite cell proliferation and differentiation by repressing Pax7. *J. Cell Biol.* **190**, 867-879.
- Czerny, T. and Busslinger, M. (1995). DNA-binding and transactivation properties of Pax-6: three amino acids in the paired domain are responsible for the different sequence recognition of Pax-6 and BSAP (Pax-5). *Mol. Cell. Biol.* **15**, 2858-2871.
- de Crozé, N., Maczkowiak, F. and Monsoro-Burq, A. H. (2011). Reiterative AP2a activity controls sequential steps in the neural crest gene regulatory network. *Proc. Natl. Acad. Sci. USA* **108**, 155-160.
- Degenhardt, K. R., Milewski, R. C., Padmanabhan, A., Miller, M., Singh, M. K., Lang, D., Engleka, K. A., Wu, M., Li, J., Zhou, D. et al. (2010). Distinct enhancers at the Pax3 locus can function redundantly to regulate neural tube and neural crest expressions. *Dev. Biol.* **339**, 519-527.
- Dey, B. K., Gagan, J. and Dutta, A. (2011). miR-206 and -486 induce myoblast differentiation by downregulating Pax7. *Mol. Cell. Biol.* **31**, 203-214.
- Dudek, H., Tantravahi, R. V., Rao, V. N., Reddy, E. S. and Reddy, E. P. (1992). Myb and Ets proteins cooperate in transcriptional activation of the mim-1 promoter. *Proc. Natl. Acad. Sci. USA* **89**, 1291-1295.
- Emambokus, N., Vegiopoulos, A., Harman, B., Jenkinson, E., Anderson, G. and Frampton, J. (2003). Progression through key stages of haemopoiesis is dependent on distinct threshold levels of c-Myb. *EMBO J.* **22**, 4478-4488.
- Erives, A. and Levine, M. (2004). Coordinate enhancers share common organizational features in the Drosophila genome. *Proc. Natl. Acad. Sci. USA* **101**, 3851-3856.
- Etchevers, H. C., Amiel, J. and Lyonnet, S. (2006). Molecular bases of human neurocristopathies. *Adv. Exp. Med. Biol.* **589**, 213-234.



- Farlie, P. G., McKeown, S. J. and Newgreen, D. F. (2004). The neural crest: basic biology and clinical relationships in the craniofacial and enteric nervous systems. *Birth Defects Res. C Embryo Today* **72**, 173-189.
- Fischer, A. and Gessler, M. (2007). Delta-Notch – and then? Protein interactions and proposed modes of repression by Hes and Hey bHLH factors. An Oct-1 binding site mediates activation of the gata2 promoter by BMP signalling. *Nucleic Acids Res.* **35**, 4583-4596.
- Fisher, S., Grice, E. A., Vinton, R. M., Bessling, S. L. and McCallion, A. S. (2006). Conservation of RET regulatory function from human to zebrafish without sequence similarity. *Science* **312**, 276-279.
- Funahashi, J., Sekido, R., Murai, K., Kamachi, Y. and Kondoh, H. (1993). Delta-crystallin enhancer binding protein delta EF1 is a zinc finger-homeodomain protein implicated in postgastrulation embryogenesis. *Development* **119**, 433-446.
- Garnett, A. T., Square, T. A. and Medeiros, D. M. (2012). BMP, Wnt and FGF signals are integrated through evolutionarily conserved enhancers to achieve robust expression of Pax3 and Zic genes at the zebrafish neural plate border. *Development* **139**, 4220-4231.
- Gewirtz, A. M. and Calabretta, B. (1988). A c-myc antisense oligodeoxynucleotide inhibits normal human hematopoiesis in vitro. *Science* **242**, 1303-1306.
- Golay, J., Broccoli, V., Borleri, G. M., Erba, E., Faretta, M., Basilico, L., Ying, G. G., Piccinini, G., Shapiro, L. H., Lovrić, J. et al. (1997). Redundant functions of B-Myb and c-Myb in differentiating myeloid cells. *Cell Growth Differ.* **8**, 1305-1316.
- Gonda, T. J. and Bishop, J. M. (1983). Structure and transcription of the cellular homolog (c-myb) of the avian myeloblastosis virus transforming gene (v-myb). *J. Virol.* **46**, 212-220.
- Halfon, M. S. (2006). (Re)modeling the transcriptional enhancer. *Nat. Genet.* **38**, 1102-1103.
- Hamburger, V. and Hamilton, H. L. (1951). A series of normal stages in the development of the chick embryo. *J. Morphol.* **88**, 49-92.
- Hare, E. E., Peterson, B. K., Iyer, V. N., Meier, R. and Eisen, M. B. (2008). Sepsis even-skipped enhancers are functionally conserved in *Drosophila* despite lack of sequence conservation. *PLoS Genet.* **4**, e1000106.
- Hong, C. S. and Saint-Jeannet, J. P. (2007). The activity of Pax3 and Zic1 regulates three distinct cell fates at the neural plate border. *Mol. Biol. Cell* **18**, 2192-2202.
- Jostes, B., Walther, C. and Gruss, P. (1990). The murine paired box gene, Pax7, is expressed specifically during the development of the nervous and muscular system. *Mech. Dev.* **33**, 27-37.
- Karafiat, V., Dvorakova, M., Krejci, E., Kralova, J., Pajer, P., Snajdr, P., Mandikova, S., Bartunek, P., Grim, M. and Dvorak, M. (2005). Transcription factor c-Myb is involved in the regulation of the epithelial-mesenchymal transition in the avian neural crest. *Cell. Mol. Life Sci.* **62**, 2516-2525.
- Karafiat, V., Dvorakova, M., Pajer, P., Cermak, V. and Dvorak, M. (2007). Melanocyte fate in neural crest is triggered by Myb proteins through activation of c-kit. *Cell. Mol. Life Sci.* **64**, 2975-2984.
- Khudyakov, J. and Bronner-Fraser, M. (2009). Comprehensive spatiotemporal analysis of early chick neural crest network genes. *Dev. Dyn.* **238**, 716-723.
- Kim, S. Y., Yang, Y. S., Hong, K. H., Jang, K. Y., Chung, M. J., Lee, D. Y., Lee, J. C., Yi, H. K., Nam, S. Y. and Hwang, P. H. (2008). Adenovirus-mediated expression of dominant negative c-myb induces apoptosis in head and neck cancer cells and inhibits tumor growth in animal model. *Oral Oncol.* **44**, 383-392.
- Kim, M. S., Kim, S. Y., Arunachalam, S., Hwang, P. H., Yi, H. K., Nam, S. Y. and Lee, D. Y. (2009). c-myb stimulates cell growth by regulation of insulin-like growth factor (IGF) and IGF-binding protein-3 in K562 leukemia cells. *Biochem. Biophys. Res. Commun.* **385**, 38-43.
- Klempnauer, K. H., Gonda, T. J. and Bishop, J. M. (1982). Nucleotide sequence of the retroviral leukemia gene v-myb and its cellular progenitor c-myb: the architecture of a transduced oncogene. *Cell* **31**, 453-463.
- Kurima, K., Hertzano, R., Gavrilova, O., Monahan, K., Shpargel, K. B., Nadaraja, G., Kawashima, Y., Lee, K. Y., Ito, T., Higashi, Y. et al. (2011). A noncoding point mutation of Zeb1 causes multiple developmental malformations and obesity in Twirler mice. *PLoS Genet.* **7**, e1002307.
- Lang, D., Brown, C. B., Milewski, R., Jiang, Y. Q., Lu, M. M. and Epstein, J. A. (2003). Distinct enhancers regulate neural expression of Pax7. *Genomics* **82**, 553-560.
- Le Douarin, N. and Kalcheim, C. (1999). *The Neural Crest*. Cambridge: Cambridge University Press.
- Lee, J. C., Sharma, M., Lee, Y. H., Lee, N. H., Kim, S. Y., Yun, J. S., Nam, S. Y., Hwang, P. H., Jhee, E. C. and Yi, H. K. (2008). Pax9 mediated cell survival in oral squamous carcinoma cell enhanced by c-myb. *Cell Biochem. Funct.* **26**, 892-899.
- Li, B., Kuriyama, S., Moreno, M. and Mayor, R. (2009). The posteriorizing gene Gbx2 is a direct target of Wnt signalling and the earliest factor in neural crest induction. *Development* **136**, 3267-3278.
- Liem, K. F., Jr, Tremml, G. and Jessell, T. M. (1997). A role for the roof plate and its resident TGFbeta-related proteins in neuronal patterning in the dorsal spinal cord. *Cell* **91**, 127-138.
- Liem, K. F., Jr, Jessell, T. M. and Briscoe, J. (2000). Regulation of the neural patterning activity of sonic hedgehog by secreted BMP inhibitors expressed by notochord and somites. *Development* **127**, 4855-4866.
- Litingtung, Y. and Chiang, C. (2000). Specification of ventral neuron types is mediated by an antagonistic interaction between Shh and Gli3. *Nat. Neurosci.* **3**, 979-985.
- Luan, Z., Liu, Y., Stuhlmiller, T. J., Marquez, J. and Garcia-Castro, M. I. (2013). SUMOylation of Pax7 is essential for neural crest and muscle development. *Cell. Mol. Life Sci.* **70**, 1793-1806.
- Ludwig, M. Z., Bergman, C., Patel, N. H. and Kreitman, M. (2000). Evidence for stabilizing selection in a eukaryotic enhancer element. *Nature* **403**, 564-567.
- Ludwig, M. Z., Palsson, A., Alekseeva, E., Bergman, C. M., Nathan, J. and Kreitman, M. (2005). Functional evolution of a cis-regulatory module. *PLoS Biol.* **3**, e93.
- Luo, G. and Yu-Lee, L. Y. (2000). Stat5b inhibits NFkappaB-mediated signaling. *Mol. Endocrinol.* **14**, 114-123.
- Maczkowiak, F., Matéos, S., Wang, E., Roche, D., Harland, R. and Monsoro-Burq, A. H. (2010). The Pax3 and Pax7 paralogs cooperate in neural and neural crest patterning using distinct molecular mechanisms, in *Xenopus laevis* embryos. *Dev. Biol.* **340**, 381-396.
- Mansouri, A., Stoykova, A., Torres, M. and Gruss, P. (1996). Dysgenesis of cephalic neural crest derivatives in Pax7<sup>-/-</sup> mutant mice. *Development* **122**, 831-838.
- Mayor, R., Young, R. and Vargas, A. (1999). Development of neural crest in *Xenopus*. *Curr. Top. Dev. Biol.* **43**, 85-113.
- McCracken, S., Leung, S., Bosselut, R., Ghysdael, J. and Miyamoto, N. G. (1994). Myb and Ets related transcription factors are required for activity of the human Ick type I promoter. *Oncogene* **9**, 3609-3615.
- Melotti, P. and Calabretta, B. (1994). Ets-2 and c-Myb act independently in regulating expression of the hematopoietic stem cell antigen CD34. *J. Biol. Chem.* **269**, 25303-25309.
- Melotti, P., Ku, D. H. and Calabretta, B. (1994). Regulation of the expression of the hematopoietic stem cell antigen CD34: role of c-myb. *J. Exp. Med.* **179**, 1023-1028.
- Meulemans, D. and Bronner-Fraser, M. (2004). Gene-regulatory interactions in neural crest evolution and development. *Dev. Cell* **7**, 291-299.
- Milet, C. and Monsoro-Burq, A. H. (2012). Neural crest induction at the neural plate border in vertebrates. *Dev. Biol.* **366**, 22-33.
- Milewski, R. C., Chi, N. C., Li, J., Brown, C., Lu, M. M. and Epstein, J. A. (2004). Identification of minimal enhancer elements sufficient for Pax3 expression in neural crest and implication of Tead2 as a regulator of Pax3. *Development* **131**, 829-837.
- Minchin, J. E. and Hughes, S. M. (2008). Sequential actions of Pax3 and Pax7 drive xanthophore development in zebrafish neural crest. *Dev. Biol.* **317**, 508-522.
- Monsoro-Burq, A. H., Wang, E. and Harland, R. (2005). Msx1 and Pax3 cooperate to mediate FGF8 and WNT signals during *Xenopus* neural crest induction. *Dev. Cell* **8**, 167-178.
- Mucenski, M. L., McLain, K., Kier, A. B., Swerdlow, S. H., Schreiner, C. M., Miller, T. A., Pietryga, D. W., Scott, W. J., Jr and Potter, S. S. (1991). A functional c-myb gene is required for normal murine fetal hepatic hematopoiesis. *Cell* **65**, 677-689.
- Murdoch, B., DeConte, C. and Garcia-Castro, M. I. (2012). Neural crest, non-neural crest and unexpected lineage contributions from mammalian Pax7 precursors. *PLoS ONE* **7**, e41089.
- Murmann, O. V., Niggli, F. and Schäfer, B. W. (2000). Cloning and characterization of the human PAX7 promoter. *Biol. Chem.* **381**, 331-335.
- Natoli, T. A., Ellsworth, M. K., Wu, C., Gross, K. W. and Pruitt, S. C. (1997). Positive and negative DNA sequence elements are required to establish the pattern of Pax3 expression. *Development* **124**, 617-626.
- Oh, I. H. and Reddy, E. P. (1999). The myb gene family in cell growth, differentiation and apoptosis. *Oncogene* **18**, 3017-3033.
- Otto, A., Schmidt, C. and Patel, K. (2006). Pax3 and Pax7 expression and regulation in the avian embryo. *Anat. Embryol. (Berl.)* **211**, 293-310.
- Papathanasiou, P., Tunningley, R., Pattabiraman, D. R., Ye, P., Gonda, T. J., Whittle, B., Hamilton, A. E., Cridland, S. O., Lourie, R. and Perkins, A. C. (2010). A recessive screen for genes regulating hematopoietic stem cells. *Blood* **116**, 5849-5858.
- Pattabiraman, D. R. and Gonda, T. J. (2013). Role and potential for therapeutic targeting of MYB in leukemia. *Leukemia* **27**, 269-277.
- Postigo, A. A., Sheppard, A. M., Mucenski, M. L. and Dean, D. C. (1997). c-Myb and Ets proteins synergize to overcome transcriptional repression by ZEB. *EMBO J.* **16**, 3924-3934.
- Prouse, M. B. and Campbell, M. M. (2012). The interaction between MYB proteins and their target DNA binding sites. *Biochim. Biophys. Acta* **1819**, 67-77.

- Pruitt, S. C., Bussman, A., Maslov, A. Y., Natoli, T. A. and Heinaman, R. (2004). Hox/Pbx and Brn binding sites mediate Pax3 expression in vitro and in vivo. *Gene Expr. Patterns* **4**, 671-685.
- Ptashne, M. (1988). How eukaryotic transcriptional activators work. *Nature* **335**, 683-689.
- Ramsay, R. G. and Gonda, T. J. (2008). MYB function in normal and cancer cells. *Nat. Rev. Cancer* **8**, 523-534.
- Ramsay, R. G., Ishii, S. and Gonda, T. J. (1992). Interaction of the Myb protein with specific DNA binding sites. *J. Biol. Chem.* **267**, 5656-5662.
- Ratajczak, M. Z., Perrotti, D., Melotti, P., Powzaniuk, M., Calabretta, B., Onodera, K., Kregenow, D. A., Machalinski, B. and Gewirtz, A. M. (1998). Myb and ets proteins are candidate regulators of c-kit expression in human hematopoietic cells. *Blood* **91**, 1934-1946.
- Romano, L. A. and Wray, G. A. (2003). Conservation of Endo16 expression in sea urchins despite evolutionary divergence in both cis and trans-acting components of transcriptional regulation. *Development* **130**, 4187-4199.
- Rushon, J. J., Davis, L. M., Lei, W., Mo, X., Leutz, A. and Ness, S. A. (2003). Distinct changes in gene expression induced by A-Myb, B-Myb and C-Myb proteins. *Oncogene* **22**, 308-313.
- Sanchez-Ferras, O., Coutaud, B., Djavanbakht Samani, T., Tremblay, I., Souchkova, O. and Pilon, N. (2012). Caudal-related homeobox (Cdx) protein-dependent integration of canonical Wnt signaling on paired-box 3 (Pax3) neural crest enhancer. *J. Biol. Chem.* **287**, 16623-16635.
- Sato, T., Sasai, N. and Sasai, Y. (2005). Neural crest determination by co-activation of Pax3 and Zic1 genes in *Xenopus* ectoderm. *Development* **132**, 2355-2363.
- Sauka-Spengler, T. and Bronner-Fraser, M. (2008). A gene regulatory network orchestrates neural crest formation. *Nat. Rev. Mol. Cell Biol.* **9**, 557-568.
- Senger, K., Armstrong, G. W., Rowell, W. J., Kwan, J. M., Markstein, M. and Levine, M. (2004). Immunity regulatory DNAs share common organizational features in *Drosophila*. *Mol. Cell* **13**, 19-32.
- Sitzmann, J., Noben-Trauth, K. and Klempner, K. H. (1995). Expression of mouse c-myb during embryonic development. *Oncogene* **11**, 2273-2279.
- Steventon, B., Carmona-Fontaine, C. and Mayor, R. (2005). Genetic network during neural crest induction: from cell specification to cell survival. *Semin. Cell Dev. Biol.* **16**, 647-654.
- Stuhlmiller, T. J. and García-Castro, M. I. (2012a). FGF/MAPK signaling is required in the gastrula epiblast for avian neural crest induction. *Development* **139**, 289-300.
- Stuhlmiller, T. J. and García-Castro, M. I. (2012b). Current perspectives of the signaling pathways directing neural crest induction. *Cell. Mol. Life Sci.* **69**, 3715-3737.
- Sun, Y., Li, H., Liu, Y., Mattson, M. P., Rao, M. S. and Zhan, M. (2008). Evolutionarily conserved transcriptional co-expression guiding embryonic stem cell differentiation. *PLoS ONE* **3**, e3406.
- Swanson, C. I., Schwimmer, D. B. and Barolo, S. (2011). Rapid evolutionary rewiring of a structurally constrained eye enhancer. *Curr. Biol.* **21**, 1186-1196.
- Syagailo, Y. V., Okladnova, O., Reimer, E., Grässle, M., Mössner, R., Gattenlöhner, S., Marx, A., Meyer, J. and Lesch, K. P. (2002). Structural and functional characterization of the human PAX7 5'-flanking regulatory region. *Gene* **294**, 259-268.
- Tahtakran, S. A. and Selleck, M. A. J. (2003). Ets-1 expression is associated with cranial neural crest migration and vasculogenesis in the chick embryo. *Gene Expr. Patterns* **3**, 455-458.
- Takagi, T., Moribe, H., Kondoh, H. and Higashi, Y. (1998). DeltaEF1, a zinc finger and homeodomain transcription factor, is required for skeleton patterning in multiple lineages. *Development* **125**, 21-31.
- Tanaka, Y., Patestos, N.P., Maekawa, T., Ishii, S., (1999). B-myb is required for inner cell mass formation at an early stage of development. *J. Biol. Chem.* **274**, 28067-28070.
- Tanno, B., Sesti, F., Cesi, V., Bossi, G., Ferrari-Amorotti, G., Bussolari, R., Tirindelli, D., Calabretta, B. and Raschella, G. (2010). Expression of Slug is regulated by c-Myb and is required for invasion and bone marrow homing of cancer cells of different origin. *J. Biol. Chem.* **285**, 29434-29445.
- Uchikawa, M., Ishida, Y., Takemoto, T., Kamachi, Y. and Kondoh, H. (2003). Functional analysis of chicken Sox2 enhancers highlights an array of diverse regulatory elements that are conserved in mammals. *Dev. Cell* **4**, 509-519.
- Van Otterloo, E., Li, W., Garnett, A., Cattell, M., Medeiros, D. M. and Cornell, R. A. (2012). Novel Tfp2-mediated control of soxE expression facilitated the evolutionary emergence of the neural crest. *Development* **139**, 720-730.
- Visel, A., Minovitsky, S., Dubchak, I. and Pennacchio, L. A. (2007). VISTA Enhancer Browser – a database of tissue-specific human enhancers. *Nucleic Acids Res.* **35**, D88-D92.
- Walker, M. J., Silliman, E., Dayton, M. A. and Lang, J. C. (1998). The expression of C-myb in human metastatic melanoma cell lines and specimens. *Anticancer Res.* **18** 2A, 1129-1135.
- Wang, Y. X. and Rudnicki, M. A. (2012). Satellite cells, the engines of muscle repair. *Nat. Rev. Mol. Cell Biol.* **13**, 127-133.
- Weirauch, M. T. and Hughes, T. R. (2010). Conserved expression without conserved regulatory sequence: the more things change, the more they stay the same. *Trends Genet.* **26**, 66-74.
- Weston, K. (1998). Myb proteins in life, death and differentiation. *Curr. Opin. Genet. Dev.* **8**, 76-81.
- Yardley, N. and García-Castro, M. I. (2012). FGF signaling transforms non-neural ectoderm into neural crest. *Dev. Biol.* **372**, 166-177.
- Yi, H. K., Nam, S. Y., Kim, J. C., Kim, J. S., Lee, D. Y. and Hwang, P. H. (2002). Induction of apoptosis in K562 cells by dominant negative c-myb. *Exp. Hematol.* **30**, 1139-1146.
- Zhao, L., Glazov, E.A., Pattabiraman, D.R., Al-Owaidi, F., Zhang, P., Brown, M.A., Leo, P.J. and Gonda, T.J. (2011). Integrated genome-wide chromatin occupancy and expression analyses identify key myeloid pro-differentiation transcription factors repressed by Myb. An Oct-1 binding site mediates activation of the gata2 promoter by BMP signaling. *Nucleic Acids Res.* **39**, 4664-4679.
